# Supplementary material
Source: publisher site journal article supplement (https://www.dovepress.com/get_supplementary_file.php?f=361863.docx)
Supplement: Supplementary file 1 [file get_supplementary_file.php]

**Low rate of clinically evident extravascular hemolysis in patients with paroxysmal nocturnal hemoglobinuria treated with a complement C5 inhibitor: results from a large, multicenter, US real-world study**

Jamile Shammo *et al.*

# Supplemental material

**Supplemental Table 1** Demographics and disease characteristics prior to the initiation of any C5 inhibitor (by subgroup)

|  | **Eculizumab only**  **n=53** | **Ravulizumab only**  **n=32** | **Switch***  **n=15** |
| --- | --- | --- | --- |
| Age at diagnosis (years) |  |  |  |
| Mean ± SD | 55.5±11.0 | 53.8±9.7 | 50.8±10.4 |
| Age at start of therapy (years) |  |  |  |
| Mean ± SD | 55.6±11.1 | 53.8±9.7 | 52.7±11.3 |
| Male sex, n (%) | 30 (56.6%) | 19 (59.4%) | 8 (53.3%) |
| Race, n (%) |  |  |  |
| White | 35 (66.0%) | 22 (68.8%) | 11 (73.3%) |
| Asian | 5 (9.4%) | 2 (6.3%) | 1 (6.7%) |
| Black/African American | 13 (24.5%) | 8 (25.0%) | 2 (13.3%) |
| Other/not reported | 0 (0.0%) | 0 (0.0%) | 1 (6.7%) |
| Ethnicity, n (%) |  |  |  |
| Hispanic/Latino/Latina | 4 (7.5%) | 1 (3.1%) | 2 (13.3%) |
| Non-Hispanic/Latino/Latina | 49 (92.5%) | 31 (96.9%) | 13 (86.7%) |
| Comorbidities (>10% of patients), n (%) |  |  |  |
| Hypertension | 29 (54.7%) | 14 (43.8%) | 7 (46.7%) |
| Depression | 9 (17.0%) | 7 (21.9%) | 3 (20.0%) |
| Diabetes | 10 (18.9%) | 6 (18.8%) | 1 (6.7%) |
| Cardiovascular disease | 8 (15.1%) | 4 (12.5%) | 3 (20.0%) |
| TE (arterial or venous) | 11 (20.8%) | 3 (9.4%) | 1 (6.7%) |
| History of MDS or AA, n (%) | 8 (15.1%) | 5 (15.6%) | 1 (6.7%) |
| MDS | 6 (11.3%) | 0 (0.0%) | 1 (6.7%) |
| AA | 2 (3.8%) | 5 (15.6%) | 0 (0.0%) |
| Active bone marrow failure† |  |  |  |
| Yes, n (%) | 13 (24.5%) | 9 (28.1%) | 2 (13.3%) |
| Data missing | 2 | 0 | 1 |
| **Disease characteristics** |  |  |  |
| % GPI-deficient granulocytes |  |  |  |
| Mean ± SD | 56.6±27.3 | 43.9±21.3 | 63.3±31.5 |
| Median (IQR) | 50.8 (35.2–80.0) | 40.5 (25.5–59.0) | 60.0 (41.7–95.0) |
| % GPI-deficient monocytes |  |  |  |
| Mean ± SD | 56.6±26.9 | 45.5±23.0 | 63.7±30.1 |
| Median (IQR) | 55.2 (30.7–80.0) | 42.8 (28.5–62.2) | 65 (36.0–95.0) |
| Data missing | 1 | 0 | 0 |
| % GPI-deficient total RBCs |  |  |  |
| Mean ± SD | 48.0±26.1 | 39.1±24.6 | 49.2±36.2 |
| Median (IQR) | 43.8 (30.0–65.6) | 38 (20.0–60.0) | 35.5 (19.4–85.9) |
| Data missing | 4 | 1 | 3 |
| LDH, n (%) |  |  |  |
| ≥1.5×ULN‡ | 42 (79.2%) | 24 (75.0%) | 10 (66.7%) |
| <1.5×ULN‡ | 8 (15.1%) | 8 (25.0%) | 4 (26.7%) |
| Data missing | 3 | 0 | 1 |
| Hemoglobin, *n* (%) |  |  |  |
| <6 g/dL | 5 (9.4%) | 4 (12.5%) | 0 (0.0%) |
| 6 to <8 g/dL | 34 (64.2%) | 18 (56.3%) | 5 (33.3%) |
| 8 to <10 g/dL | 10 (18.9%) | 9 (28.1%) | 7 (46.7%) |
| 10 to <12 g/dL | 2 (3.8%) | 1 (3.1%) | 1 (6.7%) |
| ≥12 g/dL | 0 (0.0%) | 0 (0.0%) | 1 (6.7%) |
| Data missing | 2 | 0 | 1 |
| Transfusion of pRBCs (at any time), n(%) | 50 (94.3%) | 29 (90.6%) | 10 (66.7%) |
| Absolute reticulocyte count, n (%) |  |  |  |
| ≥100×109/L | 3 (5.7%) | 3 (9.4%) | 1 (6.7%) |
| ≥120×109/L | 3 (5.7%) | 3 (9.4%) | 1 (6.7%) |
| ≥150×109/L | 3 (5.7%) | 3 (9.4%) | 1 (6.7%) |
| Data missing | 21 | 15 | 7 |
| Coombs test, n (%) |  |  |  |
| Positive | 1 (1.9%) | 3 (9.4%) | 3 (20.0%) |
| C3+ | 1 (100.0%) | 2 (66.7%) | 2 (66.7%) |
| IgG+ | 0 (0.0%) | 1 (33.3%) | 1 (33.3%) |
| Negative | 50 (94.3%) | 28 (87.5%) | 9 (60.0%) |
| Not performed | 2 (3.8%) | 1 (3.1%) | 3 (20.0%) |

**Notes:** *For the switch subgroup, baseline was defined as prior to initiation of eculizumab treatment. †Defined according to Camitta criteria, ≥2 of the following criteria: hemoglobin level <10 g/dL, platelet count <50×109/L, neutrophil count <1.5×109/L. ‡1.5×ULN=369 IU/L. Abbreviations: AA, aplastic anemia; C3, complement protein 3; C5, complement protein 5; GPI, glycosylphosphatidylinositol; IgG, immunoglobulin G; IQR, interquartile range; LDH, lactate dehydrogenase; MDS, myelodysplastic syndrome; pRBCs, packed red blood cells; RBCs, red blood cells; SD, standard deviation; TE, thromboembolic event; ULN, upper limit of normal.

**Supplemental Table 2** Treatment characteristics by subgroup

|  | **Eculizumab only**  **n=53** | **Ravulizumab only**  **n=32** | **Switch***  **n=15** |
| --- | --- | --- | --- |
| **Reason for C5 inhibitor initiation,*† n (%)** |  |  |  |
| Symptoms of hemolysis | 47 (88.7%) | 27 (84.4%) | 12 (80.0%) |
| LDH ≥1.5×ULN‡ | 45 (84.9%) | 25 (78.1%) | 13 (86.7%) |
| High GPI-deficient clone (any kind) | 40 (75.5%) | 20 (62.5%) | 15 (100.0%) |
| Previous TE | 20 (37.7%) | 3 (9.4%) | 2 (13.3%) |
| Hemolytic crisis requiring hospitalization | 10 (18.9%) | 7 (21.9%) | 2 (13.3%) |
| Prevent complications | 1 (1.9%) | 1 (3.1%) | 1 (6.7%) |
| Proteinuria and CKD | 0 (0.0%) | 0 (0.0%) | 1 (6.7%) |
| Prevent thrombosis | 0 (0.0%) | 1 (3.1%) | 0 (0.0%) |
| **Reason for switching from eculizumab to ravulizumab,† n (%)** |  |  |  |
| Patient preference | NA | NA | 11 *(*73.3%) |
| Reduced treatment frequency | NA | NA | 10 *(*66.7%) |
| Reduced time required to get treatment§ | NA | NA | 8 *(*53.3%) |
| Treatment efficacy | NA | NA | 5 *(*33.3%) |
| High GPI-deficient clone (any kind) | NA | NA | 4 *(*26.7%) |
| Improved quality of life | NA | NA | 4 *(*26.7%) |
| LDH ≥1.5×ULN‡ | NA | NA | 2 *(*13.3%) |
| Symptoms of hemolysis | NA | NA | 2 *(*13.3%) |
| Previous TE | NA | NA | 1 *(*6.7%) |
| Improved symptom control | NA | NA | 1 *(*6.7%) |
| **Duration of treatment║ (months)** |  |  |  |
| Mean ± SD | 25.4±15.5 | 18.1±3.6 | 48.0±22.7 |
| Range (minimum–maximum) | 5.4–79.4 | 13.4–25.1 | 15.4–84.0 |
| **Eculizumab treatment characteristics** |  |  |  |
| Last reported maintenance dose, n (%) |  |  |  |
| 900 mg | 42 (79.2%) | NA | 11 (73.3%) |
| 1200 mg | 11 (20.8%) | NA | 3 (20.0%) |
| Missing | 0 (0.0%) | NA | 1 (6.7%) |
| Last reported infusion frequency, n (%) |  |  |  |
| 12–13 days | 0 (0.0%) | NA | 0 (0.0%) |
| 14 days | 40 (75.5%) | NA | 13 (86.7%) |
| 15–16 days | 13 (24.5%) | NA | 1 (6.7%) |
| Missing | 0 (0.0%) | NA | 1 (6.7%) |
| Dose modification, n (%) | 1 (1.9%) | NA | 0 (0.0%) |
| Temporary increase to weekly | 1 (1.9%) | NA | 0 (0.0%) |
| Reason: hemolysis/LDH ≥ 1.5 × ULN‡ | 1 (1.9%) | NA | 0 (0.0%) |
| Treatment interruption, n (%) | 0 (0.0%) | NA | 1 (6.7%) |
| Duration in days, mean ± SD | NA | NA | 7.0 ± 0.0 |
| Reason: vacation, traveling | NA | NA | 1 (6.7%) |
| **Ravulizumab treatment characteristics** |  |  |  |
| Last reported maintenance dose, n (%) |  |  |  |
| 3000 mg | NA | 1 (3.1%) | 2 *(*13.3%) |
| 3300 mg | NA | 30 (93.8%) | 12 *(*80.0%) |
| 3600 mg | NA | 1 (3.1%) | 1 *(*6.7%) |
| Last reported infusion frequency, n (%) |  |  |  |
| 8 weeks | NA | 32 (100.0%) | 15 (100.0%) |
| Dose modification, n (%) | NA | 0 (0.0%) | 0 (0.0%) |
| Treatment interruption, n (%) | NA | 0 (0.0%) | 0 (0.0%) |

**Notes:** *In the switch group, reason for initiating C5 inhibitor treatment was defined as the reason for starting eculizumab. †Multiple reasons possible. ‡1.5×ULN=369 IU/L. §Including travel. **║**Start to last encounter. For patients in the switch subgroup,treatment duration was defined as the sum of the two treatment durations. Abbreviations: C5, complement protein C5; CKD, chronic kidney disease; GPI, glycosylphosphatidylinositol; LDH, lactate dehydrogenase; NA, not applicable; SD, standard deviation; TE, thromboembolic event; ULN, upper limit of normal.

**Supplemental Table 3** Change in laboratory values between baseline and follow-up by subgroup (routine visits)

|  | **Baseline mean** | **Follow-up***  **mean** | **Difference mean** | **95% CI** | **P value**† |
| --- | --- | --- | --- | --- | --- |
| **Eculizumab only** |  |  |  |  |  |
| Hemoglobin (g/dL), n=50 | 7.2 | 10.4 | 3.1 | 2.6, 3.7 | <0.001 |
| Absolute reticulocyte count (×109/L), n=28 | 92.9 | 64.0 | –28.9 | –87.0, 29.1 | 0.316 |
| Platelet count (×109/L), n=50 | 146.2 | 179.7 | 33.5 | 3.3, 63.7 | 0.031 |
| White blood cell count (×109/L), n=50 | 6.1 | 5.8 | –0.3 | –1.1, 0.5 | 0.444 |
| Neutrophil count (×109/L), n=41 | 3.5 | 3.0 | –0.5 | –1.3, 0.2 | 0.133 |
| ALT (U/L), n=23 | 54.0 | 39.6 | –14.4 | –23.6, –5.2 | 0.004 |
| AST (U/L), n=23 | 55.3 | 38.7 | –16.6 | –25.6, –7.7 | <0.001 |
| Lactate dehydrogenase (IU/L), n=49 | 605.7 | 246.5 | –359.2 | –459.5, –258.9 | <0.001 |
| Bilirubin (mg/dL), n=48 | 2.9 | 1.4 | –1.5 | –1.8, -–1.1 | <0.001 |
| Indirect bilirubin (mg/dL), n=14 | 2.5 | 1.2 | –1.4 | –1.8, –0.9 | <0.001 |
| Ferritin (µg/L), n=7 | 459.3 | 342.2 | –117.1 | –299.3, 65.2 | 0.167 |
| D-dimers (ng/mL), n=5 | 614.0 | 157.1 | –456.9 | –9983, 84.4 | 0.079 |
| GPI-deficient granulocytes (%), n=8 | 51.8 | 32.5 | –19.3 | –45.1, 6.5 | 0.121 |
| GPI-deficient monocytes (%), n=7 | 46.2 | 26.6 | –19.6 | –50.5, 11.2 | 0.170 |
| GPI-deficient total RBCs (%), n=7 | 41.8 | 24.6 | –17.2 | –42.6, 8.1 | 0.147 |
| Number of transfusions**‡**, n=53 | 3.6 | 1.6 | –2.1 | –2.9, –1.3 | <0.001 |
| Number of transfusions**‡** among patients with ≥1 transfusion at baseline and ≥1 transfusion during follow-up*, n=24 | 4.3 | 3.4 | –0.9 | –1.7, –0.1 | 0.037 |
| **Ravulizumab only** |  |  |  |  |  |
| Hemoglobin, mean (g/dL), n=32 | 7.2 | 10.4 | 3.2 | 2.5, 3.8 | <0.001 |
| Absolute reticulocyte count (×109/L), n=16§ | 121.4 | 517.9 | 396.5 | –106.6, 899.5 | 0.114 |
| Platelet count (×109/L), n=32 | 137.2 | 203.1 | 65.9 | 35.9, 95.9 | <0.001 |
| White blood cell count (×109/L), n=32 | 5.7 | 5.9 | 0.25 | –0.8, 1.3 | 0.637 |
| Neutrophils (×109/L), n=20 | 3.2 | 2.6 | –0.6 | –1.8, 0.6 | 0.313 |
| ALT (U/L), n=15 | 77.9 | 42.3 | –35.6 | –56.2, –15.1 | 0.002 |
| AST (U/L), n=15 | 75.8 | 49.1 | –26.7 | –52.2, –1.1 | 0.042 |
| Lactate dehydrogenase (IU/L), n=31 | 506.0 | 204.1 | –302.0 | –378.2, –225.7 | <0.001 |
| Bilirubin (mg/dL), n=32 | 3.5 | 1.4 | –2.1 | –2.6, –1.7 | <0.001 |
| Indirect bilirubin (mg/dL), n=13 | 3.4 | 1.1 | –2.3 | –3.1, –1.5 | <0.001 |
| Ferritin (µg/L), n=4 | 482.3 | 422.4 | –59.9 | –372.9, 253.2 | 0.586 |
| D-dimers (ng/mL), n=3 | 580.0 | 200.0 | –380.0 | –681.2, –78.8 | 0.032 |
| GPI-deficient granulocytes (%), n=3 | 35.0 | 35.0 | 0 | 0, 0 |  |
| GPI-deficient monocytes (%), n=3 | 35.0 | 35.0 | 0 | 0, 0 |  |
| GPI-deficient total RBCs (%), n=3 | 26.7 | 26.7 | 0 | 0, 0 |  |
| Number of transfusions**‡**, n=32 | 2.4 | 0.7 | –1.8 | –2.7, –0.8 | <0.001 |
| Number of transfusions**‡** among patients with ≥1 transfusion at baseline and ≥1 transfusion during follow-up*, n=10 | 3.1 | 1.8 | –1.3 | –4.1, 1.5 | 0.318 |
| **Eculizumab to ravulizumab switch** |  |  |  |  |  |
| Hemoglobin (g/dL), n=14 | 8.6 | 11.2 | 2.6 | 1.4, 3.8 | <0.001 |
| Absolute reticulocyte count (×109/L), n=7 | 18.4 | 42.9 | 24.6 | 10.7, 38.4 | 0.005 |
| Platelet count (×109/L), n=14 | 162.1 | 176.3 | 14.1 | –12.0, 40.2 | 0.264 |
| White blood cell count (×109/L), n=14 | 6.1 | 5.5 | –0.6 | –2.1, 0.8 | 0.369 |
| Neutrophils (×109/L), n=11 | 2.9 | 2.8 | –0.2 | –1.4, 1.0 | 0.738 |
| ALT (U/L), n=7 | 47.0 | 27.5 | –19.5 | –36.6, –2.4 | 0.032 |
| AST (U/L), n=7 | 52.0 | 29.6 | –22.4 | –43.2, –1.6 | 0.039 |
| Lactate dehydrogenase (IU/L), n=13 | 805.5 | 188.0 | –617.6 | –1202.4, 32.8 | 0.04 |
| Bilirubin (mg/dL), n=13 | 2.9 | 1.4 | –1.4 | –2.1, –0.7 | <0.001 |
| Indirect bilirubin (mg/dL), n=5 | 2.8 | 1.0 | –1.8 | –3.5, –0.1 | 0.042 |
| Ferritin (µg/L), n=1 | 224.0 | 76.0 | –148.0 |  |  |
| D-dimers (ng/mL), n=0 | NA | NA |  |  |  |
| GPI-deficient granulocytes (%), n=0 | NA | NA |  |  |  |
| GPI-deficient monocytes (%), n=0 | NA | NA |  |  |  |
| GPI-deficient total RBCs (%), n=0 | NA | NA |  |  |  |
| Number of transfusions**‡**, n=15 | 3.0 | 0.0 | –3.0 | –5.2, –0.9 | 0.010 |
| Number of transfusions**‡** among patients with ≥1 transfusion at baseline and ≥1 transfusion during follow-up*, n=0 | NA | NA |  |  |  |

**Notes:** *Follow-up was defined as the last 6 months of treatment for all variables except transfusion, which was assessed over 12 months in patients treated with eculizumab or ravulizumab only and over 6 months for patients in the switch subgroup. †Difference and *p* value calculated using a paired t-test. **‡**Transfusions of packed RBCs. §Three patients had absolute reticulocyte counts that were 2 SD greater than the mean. When these patients were excluded (n=13): mean at baseline was 26.4×109/L; mean at 6 months was 45.4×109/L; change from baseline was 19.0 (95% CI 7.4–30.6) ×109/L. Abbreviations: ALT, alanine transaminase; AST, aspartate transaminase; CI, confidence interval; GPI, glycosylphosphatidylinositol; NA, not applicable; RBCs, red blood cells; SD, standard deviation.
